# Supplementary material for: In Silico Genome-Scale Analysis of Molecular Mechanisms Contributing to the Development of a Persistent Infection with Methicillin-Resistant Staphylococcus aureus (MRSA) ST239
Source: MDPI journal article supplement (doi:10.3390/ijms232416086), 2022-12-16
Supplement: s1 [file s1]

**Supplementary Table S1.** *S. aureus* SA943 virulom.

| Protein group                              | Protein                                                                 | Protein accession number |
|--------------------------------------------|-------------------------------------------------------------------------|--------------------------|
| 1                                          | 2                                                                       | 3                        |
| <b>Hemolysins</b>                          | Alpha-hemolysin                                                         | RAM45765.1               |
|                                            | Beta-hemolysin                                                          | RAM45197.1               |
|                                            | Gamma-hemolysin subunit A                                               | RAM47209.1               |
|                                            | Gamma-hemolysin subunit B                                               | RAM47121.1               |
|                                            | Gamma-hemolysin subunit C                                               | RAM47120.1               |
|                                            | Hemolysin III                                                           | RAM45352.1               |
| <b>Leukocidins</b>                         | LukED subunit D                                                         | RAM45663.1               |
|                                            | LukED subunit E                                                         | RAM45662.1               |
|                                            | LukGH subunit H                                                         | RAM45195.1               |
|                                            | LukGH subunit G                                                         | RAM45196.1               |
| <b>Phenol-soluble modulins</b>             | Phenol-soluble modulins export ABC transporter ATP-binding protein PmtA | RAM45801.1               |
|                                            | Phenol-soluble modulins export ABC transporter permease subunit PmtB    | RAM45802.1               |
|                                            | Phenol-soluble modulins export ABC transporter ATP-binding protein PmtC | RAM45803.1               |
|                                            | Phenol-soluble modulins export ABC transporter permease subunit PmtD    | RAM45804.1               |
|                                            | Beta-class phenol-soluble modulins                                      | RAM45753.1               |
|                                            | Beta-class phenol-soluble modulins                                      | RAM45754.1               |
|                                            | Phenol-soluble modulins PSM-alpha-1                                     | RAM45730.1               |
|                                            | Phenol-soluble modulins PSM-alpha-2                                     | RAM45731.1               |
|                                            | Phenol-soluble modulins PSM-alpha-3                                     | RAM45732.1               |
|                                            | Phenol-soluble modulins PSM-alpha-4                                     | RAM45733.1               |
|                                            | Delta-lysins family phenol-soluble modulins                             | RAM45554.1               |
|                                            | Phenol-soluble modulins PSM-mec                                         | RAM45233.1               |
| <b>Enterotoxins</b>                        | Enterotoxin Q (SEQ)                                                     | RAM45503.1               |
|                                            | Enterotoxin K (SEK)                                                     | RAM45504.1               |
|                                            | Enterotoxin A                                                           | RAM45425.1               |
|                                            | Enterotoxin 26                                                          | RAM47603.1               |
| <b>Superantigen-like proteins(SSL)</b>     | SSL1                                                                    | RAM45984.1               |
|                                            | SSL2                                                                    | RAM45983.1               |
|                                            | SSL3                                                                    | RAM45982.1               |
|                                            | SSL4                                                                    | RAM45980.1               |
|                                            | SSL5                                                                    | RAM45979.1               |
|                                            | SSL6                                                                    | RAM45978.1               |
|                                            | SSL7                                                                    | RAM45977.1               |
|                                            | SSL8                                                                    | RAM45976.1               |
|                                            | SSL9                                                                    | RAM45975.1               |
|                                            | SSL10                                                                   | RAM45974.1               |
|                                            | SSL11                                                                   | RAM45728.1               |
|                                            | SSL12                                                                   | RAM45762.1               |
|                                            | SSL13                                                                   | RAM45761.1               |
|                                            | SSL14                                                                   | RAM45760.1               |
| <b>Serine (Spl) and cysteine proteases</b> | Serine protease (SplA)                                                  | RAM45676.1               |
|                                            | Serine protease (SplB)                                                  | RAM45677.1               |
|                                            | Serine protease (SplC)                                                  | RAM45678.1               |
|                                            | Serine protease (SplF)                                                  | RAM45679.1               |
|                                            | Мембраносвязанная сериновая протеаза                                    | RAM47657.1               |
|                                            | Serine endopeptidase SspA                                               | RAM47318.1               |
|                                            | S41 family peptidase                                                    | RAM47419.1               |
|                                            | Rhomboid family intramembrane serine protease                           | RAM47553.1               |
|                                            | Cysteine protease staphopain B                                          | RAM47317.1               |
|                                            | Cysteine protease staphopain A                                          | RAM45827.1               |

**Supplementary Table S1 (continued).**

| 1                                          | 2                                                               | 3          |
|--------------------------------------------|-----------------------------------------------------------------|------------|
| <b>Serine (Spl) and cysteine proteases</b> | Staphostatin B                                                  | RAM47316.1 |
|                                            | S8 family serine peptidase                                      | RAM45670.1 |
|                                            | Zinc metalloproteinase aureolysin                               | RAM45971.1 |
| <b>Adhesions and invasions</b>             | Coagulase                                                       | RAM47813.1 |
|                                            | Catalase                                                        | RAM46449.1 |
|                                            | Thermonuclease                                                  | RAM46449.1 |
|                                            | YSIRK domain-containing triacylglycerol Lip1                    | RAM45969.1 |
|                                            | Glycerol kinase GlpK                                            | RAM46556.1 |
|                                            | Aerobic glycerol-3-phosphate dehydrogenase                      | RAM46555.1 |
|                                            | Immunoglobulin G-binding protein A                              | RAM47916.1 |
|                                            | Immunoglobulin G-binding protein Sbi                            | RAM47117.1 |
|                                            | MSCRAMM family adhesin clumping factor ClfA                     | RAM45532.1 |
|                                            | MSCRAMM family adhesin clumping factor ClfB                     | RAM45959.1 |
|                                            | Cna B-type domain-containing protein                            | RAM46073.1 |
|                                            | Elastin-binding protein EbpS                                    | RAM47482.1 |
|                                            | Extracellular matrix protein-binding adhesin Emp                | RAM45531.1 |
|                                            | MSCRAMM family adhesin SdrE                                     | RAM46170.1 |
|                                            | MSCRAMM family adhesin SdrC                                     | RAM46168.1 |
|                                            | MSCRAMM family adhesin SdrD                                     | RAM46169.1 |
|                                            | Serine-enriched repetitive glycoprotein adhesin SasA            | RAM45936.1 |
|                                            | Cell wall anchored protein SasF                                 | RAM45943.1 |
|                                            | Virulence-associated cell-wall anchored protein SasG            | RAM47201.1 |
|                                            | Class A sortase SrtA                                            | RAM46780.1 |
|                                            | Class B sortase SrtB                                            | RAM45126.1 |
|                                            | Fibronectin-binding protein A                                   | RAM46647.1 |
|                                            | Complement inhibitor SCIN-B                                     | RAM45768.1 |
|                                            | Efb fibrinogen-binding protein                                  | RAM45769.1 |
|                                            | Ecb complement convertase inhibitor                             | RAM45773.1 |
|                                            | Intercellular adhesin biosynthesis polysaccharide N-deacetylase | RAM45922.1 |
|                                            | Polysaccharide biosynthesis protein                             | RAM45388.1 |
|                                            | Poly-beta-1,6-N-acetyl-D-glucosamine synthesis protein IcaD     | RAM45923.1 |
|                                            | Poly-beta-1,6 N-acetyl-D-glucosamine synthase IcaA              | RAM45924.1 |
|                                            | Ica operon transcriptional regulator IcaR                       | RAM45925.1 |
|                                            | Capsule biosynthesis protein CapA                               | RAM45926.1 |
|                                            | Polysaccharide biosynthesis tyrosine autokinase                 | RAM45927.1 |
|                                            | Tyrosine-protein phosphatase                                    | RAM45928.1 |
|                                            | Type 8 capsular polysaccharide synthesis protein Cap8K          | RAM47868.1 |
|                                            | Type 8 capsular polysaccharide synthesis protein Cap8I          | RAM47870.1 |
|                                            | Type 8 capsular polysaccharide synthesis protein Cap8H          | RAM47871.1 |
|                                            | Type 8 capsular polysaccharide synthesis protein Cap8F          | RAM47873.1 |
|                                            | Type 8 capsular polysaccharide synthesis protein Cap8C          | RAM47876.1 |
|                                            | Type 8 capsular polysaccharide synthesis protein Cap8B          | RAM47877.1 |
|                                            | LPXTG-anchored adenosine synthase AdsA                          | RAM46119.1 |
|                                            | BsaG protein                                                    | RAM45673.1 |
|                                            | Extracellular adherence protein Eap/Map                         | RAM45198.1 |
|                                            | MAP domain-containing protein                                   | RAM45199.1 |
| <b>Regulatory factors</b>                  | Accessory gene regulator protein A AgrA                         | RAM45557.1 |
|                                            | Accessory gene regulator protein B AgrB                         | RAM45555.1 |
|                                            | Вспомогательный генный регулятор AgrC                           | RAM45580.1 |
|                                            | Cyclic lactone autoinducer peptide (regulator protein agrD)     | RAM45556.1 |
|                                            | Global transcriptional regulator SarA                           | RAM46821.1 |
|                                            | HTP- type transcriptional regulator SarR                        | RAM46294.1 |
|                                            | HTP- type transcriptional regulator SarS                        | RAM47915.1 |
|                                            | HTP- type transcriptional regulator SarT                        | RAM47202.1 |
|                                            | HTP-type transcriptional regulator SarX                         | RAM47004.1 |
|                                            | Регулятор транскрипции SarZ                                     | ?          |

**Supplementary Table S1** (continued).

| 1                         | 2                                                                          | 3          |
|---------------------------|----------------------------------------------------------------------------|------------|
| <b>Regulatory factors</b> | HTP- type transcriptional regulator SarV                                   | RAM46266.1 |
|                           | HTP- type transcriptional regulator SarU                                   | RAM46810.1 |
|                           | HTP- type transcriptional regulator MgrA                                   | RAM46890.1 |
|                           | HTP-type transcriptional regulator  MarR(Rot)<br>(Repressor of toxins Rot) | RAM45395.1 |
|                           | Metal-dependent transcriptional regulator                                  | RAM46837.1 |
|                           | AraC family transcriptional regulator                                      | RAM46871.1 |
|                           | LysR family transcriptional regulator                                      | RAM46876.1 |
|                           | TetR/AcrR family transcriptional regulator                                 | RAM46695.1 |
|                           | TetR/AcrR family transcriptional regulator                                 | RAM46731.1 |
|                           | Sugar-binding transcriptional regulator DeoR                               | RAM46982.1 |
|                           | Helix-turn-helix transcriptional regulator                                 | RAM46996.1 |
|                           | RNA polymerase sigma factor Sig B                                          | RAM46417.1 |
|                           | Anti-Sig B factor RsbW                                                     | RAM46416.1 |

**Supplementary Table S2a.** *Staphylococcus aureus* protein A (Spa) amino acid sequence: amino acid substitution localization.

**Supplementary Table S2a.** *Staphylococcus aureus* protein A (Spa) amino acid sequence: amino acid substitution localization.

| Strain     | Protein<br>accession number | Aa<br>number | Query<br>Cover<br>(%) | Per.<br>Ident<br>(%) | Amino acid substitutions |          |     |          |          |          |          |          |          |     |
|------------|-----------------------------|--------------|-----------------------|----------------------|--------------------------|----------|-----|----------|----------|----------|----------|----------|----------|-----|
|            |                             |              |                       |                      | Protein region           |          |     |          |          |          |          |          |          |     |
|            |                             |              |                       |                      | S                        | D        |     |          | A        | C        |          |          |          |     |
|            |                             |              |                       |                      | 13                       | 99       | 104 | 120      | 199      | 292      | 332      | 339      | 419      | 461 |
| NCTC8325-4 | AAA26676.1                  | 524          | 100                   | 100                  | M                        | N        | Q   | A        | S        | T        | N        | N        | G        | D   |
| NCTC 8325  | SQF72440.1                  | 516          | 100                   | 98,47                | M                        | N        | Q   | A        | S        | T        | N        | N        | G        | D   |
| Newman     | BAF66327.1                  | 520          | 97                    | 96,76                | <b>L</b>                 | N        | Q   | A        | S        | T        | N        | N        | G        | D   |
| Col        | AAW38738.1                  | 508          | 100                   | 96,56                | M                        | N        | Q   | A        | S        | T        | N        | N        | G        | D   |
| FPR3757    | ABD22331.1                  | 508          | 100                   | 96,56                | M                        | N        | Q   | A        | S        | T        | N        | N        | G        | D   |
| N315       | BAB41326.1                  | 492          | 100                   | 82,25                | M                        | N        | Q   | A        | S        | <b>N</b> | <b>K</b> | <b>G</b> | G        | D   |
| MRSA252    | CAG39140.1                  | 516          | 100                   | 96,97                | M                        | <b>K</b> | Q   | <b>E</b> | <b>A</b> | T        | N        | N        | G        | D   |
| MW2        | BAB93949.1                  | 450          | 100                   | 92,94                | M                        | N        | Q   | A        | S        | T        | N        | <b>G</b> | <b>N</b> | D   |
| 55/2053    | EEV05371.2                  | 442          | 100                   | 79,01                | M                        | <b>K</b> | Q   | <b>E</b> | <b>A</b> | T        | N        | N        | G        | D   |
| Bmb9393    | AGP27111.1                  | 418          | 83                    | 83,33                | M                        | <b>K</b> | Q   | <b>E</b> | <b>A</b> | T        | N        | N        | G        | D   |
| Be62       | ALY21933.1                  | 438          | 100                   | 75,76                | <b>L</b>                 | <b>K</b> | Q   | <b>E</b> | <b>A</b> | T        | N        | N        | G        | D   |

|         |                |     |     |       |          |          |          |          |          |   |   |   |   |          |
|---------|----------------|-----|-----|-------|----------|----------|----------|----------|----------|---|---|---|---|----------|
| TW20    | CBI48007.1     | 426 | 100 | 75,95 | M        | <b>K</b> | Q        | <b>E</b> | <b>A</b> | T | N | N | G | D        |
| JKD6008 | ADL64170.1     | 438 | 100 | 75,57 | <b>L</b> | <b>K</b> | <b>R</b> | <b>E</b> | <b>A</b> | T | N | N | G | D        |
| T0131   | WP_000728717.1 | 418 | 100 | 82,42 | M        | <b>K</b> | <b>R</b> | <b>E</b> | <b>A</b> | T | N | N | G | <b>A</b> |
| Z172    | AGY88223.1     | 426 | 100 | 75,95 | M        | <b>K</b> | Q        | <b>E</b> | <b>A</b> | T | N | N | G | D        |
| V521    | WP_000728706.1 | 426 | 100 | 75,95 | M        | <b>K</b> | Q        | <b>E</b> | <b>A</b> | T | N | N | G | D        |
| SA943   | RAM47916.1     | 418 | 100 | 82,42 | M        | <b>K</b> | <b>R</b> | <b>E</b> | <b>A</b> | T | N | N | G | <b>A</b> |

Note: domain localization is indicated in strain NCTC 8325-4 according to (Uhlen M, 1984): 1-39 aa - signal sequence (S); 40-93 aa – E domain; 94-150 aa - D domain; 156-213 aa - A domain; 214-274 aa - B domain; 275-342 aa - C domain; 339-441 aa - X-variable region; 469-524 aa - C-terminus, including LPxTG motif (490-494 aa) peptidoglycan attachment region.

**Table S2b.** *Staphylococcus aureus* protein A (Spa) amino acid sequence: localization of insertions and deletions.

| Strain     | Protein<br><br>accession number | Insertions | Deletions                                      |            |                     |             |             |             |             |             |             |                     |             |             |             |             |
|------------|---------------------------------|------------|------------------------------------------------|------------|---------------------|-------------|-------------|-------------|-------------|-------------|-------------|---------------------|-------------|-------------|-------------|-------------|
|            |                                 | S          | Domains<br>EDBAC<br>(IgG<br>binding<br>region) | X - region |                     |             |             |             |             |             |             |                     |             |             |             |             |
|            |                                 |            |                                                | 1-12       | <b>130-<br/>187</b> | 226-<br>283 | 344-<br>362 | 336-<br>343 | 344-<br>375 | 354-<br>369 | 357-<br>372 | <b>360-<br/>407</b> | 380-<br>395 | 388-<br>395 | 397-<br>409 | 393-<br>409 |
| NCTC8325-4 | AAA26676.1                      | -          | -                                              | -          | -                   | -           | -           | -           | -           | -           | -           | -                   | -           | -           | -           |             |
| NCTC8325   | WP_000728764.1                  | -          | -                                              | -          | -                   | +           | -           | -           | -           | -           | -           | -                   | -           | -           | -           |             |
| Newman     | BAF66327.1                      | +          | -                                              | -          | -                   | -           | -           | +           | -           | -           | -           | -                   | -           | -           | -           |             |
| Col        | AAW38738.1                      | -          | -                                              | -          | -                   | -           | -           | -           | -           | -           | -           | +                   | +           | -           | -           |             |
| FPR3757    | ABD22331.1                      | -          | -                                              | -          | -                   | -           | -           | -           | -           | -           | -           | -                   | -           | +           | -           |             |
| N315       | BAB41326.1                      | -          | -                                              | -          | -                   | -           | -           | -           | +           | -           | -           | -                   | -           | -           | -           |             |
| MRSA252    | CAG39140.1                      | -          | -                                              | -          | -                   | -           | -           | -           | -           | -           | -           | -                   | -           | -           | -           |             |
| MW2        | BAB93949.1                      | -          | -                                              | +          | -                   | -           | +           | -           | -           | -           | -           | -                   | -           | -           | -           |             |
| 55/2053    | EEV05371.2                      | -          | +                                              | -          | -                   | -           | -           | -           | -           | -           | +           | -                   | -           | -           | +           |             |
| Bmb9393    | AGP27111.1                      | -          | +                                              | -          | +                   | -           | -           | -           | -           | -           | +           | -                   | -           | -           | +           |             |

|         |                |   |   |   |   |   |   |   |   |   |   |   |   |   |   |
|---------|----------------|---|---|---|---|---|---|---|---|---|---|---|---|---|---|
| Be62    | ALY21933.1     | + | + | - | - | - | - | + | - | - | + | - | - | - | + |
| TW20    | CBI48007.1     | - | + | - | - | - | - | + | - | - | + | - | - | - | + |
| JKD6008 | ADL64170.1     | + | + | - | - | - | - | + | - | - | + | - | - | - | + |
| T0131   | WP_000728717.1 | - | + | - | - | - | - | - | - | + | - | - | - | - | - |
| Z172    | AGY88223.1     | - | + | - | - | - | - | + | - | - | + | - | - | - | + |
| V521    | WP_000728706.1 | - | + | - | - | - | - | + | - | - | + | - | - | - | + |
| SA943   | RAM47916.1     | - | + | - | - | - | - | - | - | + | - | - | - | - | - |

Note: The presence of deletions is marked with a cross on a light gray background.

**Supplementary Table S3a.** *Staphylococcus aureus* fibronectin-binding protein A (FnBPA) amino acid sequence: localization of amino acid substitutions.

| Strain   | Protein<br>accession number    | Number of<br>amino acids | Query<br>Cover<br>(%) | Per<br>Ident<br>(%) | Localization and number of substitutions<br>in different protein regions |               |                     |                     |          |              | Total number<br>of<br>substitutions |
|----------|--------------------------------|--------------------------|-----------------------|---------------------|--------------------------------------------------------------------------|---------------|---------------------|---------------------|----------|--------------|-------------------------------------|
|          |                                |                          |                       |                     | S                                                                        | Nv            | Fg                  | Fn                  | C<br>PPR | C<br>(WMC)   |                                     |
|          |                                |                          |                       |                     | 1-37                                                                     | 38-<br>195    | 194-511             | 512-885             | 886-993  | 994-<br>1079 |                                     |
| NCTC8325 | <a href="#">WP_000794582.1</a> | <b>1018</b>              | 100                   | 100                 | -                                                                        | -             | -                   | -                   | -        | -            | 0                                   |
| Newman   | BAF68671.1                     | 741                      | 100                   | 99,19               | -                                                                        | -             | <b><i>E509G</i></b> | <b>+ (4)</b>        | -        | -            | <b>5</b>                            |
| Col      | <a href="#">WP_000794589.1</a> | <b>1018</b>              | 100                   | 99,8                | -                                                                        | -             | <b><i>E509G</i></b> | <b><i>K703E</i></b> | -        | -            | <b>2</b>                            |
| FPR3757  | <a href="#">WP_000794589.1</a> | <b>1018</b>              | 100                   | 99,8                | -                                                                        | -             | <b><i>E509G</i></b> | <b><i>K703E</i></b> | -        | -            | <b>2</b>                            |
| N315     | <a href="#">WP_000794614.1</a> | 1038                     | 83                    | 83,28               | -                                                                        | <b>+ (13)</b> | <b>+ (98)</b>       | <b>+ (28)</b>       | -        | -            | <b>139</b>                          |
| MRSA252  | <a href="#">WP_000794580.1</a> | 965                      | 86                    | 78,38               | <b>+ (1)</b>                                                             | <b>+ (11)</b> | <b>+ (106)</b>      | <b>+ (32)</b>       | -        | -            | <b>150</b>                          |
| MW2      | <a href="#">WP_000794648.1</a> | 1015                     | 85                    | 84,08               | -                                                                        | <b>+ (12)</b> | <b>+ (109)</b>      | <b>+ (28)</b>       | -        | -            | <b>149</b>                          |
| 55/2053  | <a href="#">WP_000794642.1</a> | 1042                     | 83                    | 82,27               | -                                                                        | <b>+ (11)</b> | <b>+ (104)</b>      | <b>+ (38)</b>       | -        | -            | <b>153</b>                          |



|         |                       |             |     |       |   |   |                     |                     |                    |   |          |
|---------|-----------------------|-------------|-----|-------|---|---|---------------------|---------------------|--------------------|---|----------|
| Bmb9393 | <u>AGP29431.1</u>     | <b>1018</b> | 100 | 99,8  | - | - | <b><i>E509G</i></b> | <b><i>K703E</i></b> | -                  | - | <b>2</b> |
| Be62    | <u>WP_000794589.1</u> | <b>1018</b> | 100 | 99,8  | - | - | <b><i>E509G</i></b> | <b><i>K703E</i></b> | -                  | - | <b>2</b> |
| TW20    | <u>CBI50487.1</u>     | 995         | 97  | 99,8  | - | - | <b><i>E509G</i></b> | <b><i>K703E</i></b> | -                  | - | <b>2</b> |
| JKD6008 | <u>WP_000794589.1</u> | <b>1018</b> | 100 | 99,8  | - | - | <b><i>E509G</i></b> | <b><i>K703E</i></b> | -                  | - | <b>2</b> |
| T0131   | WP_000794592.1        | 990         | 100 | 96,56 | - | - | <b><i>E509G</i></b> | <b><i>K703E</i></b> | + (4) <sup>1</sup> | - | <b>7</b> |
| Z172    | <u>AGY90698.1</u>     | 967         | 100 | 96,98 | - | - | <b><i>E509G</i></b> | <b><i>K703E</i></b> | -                  | - | <b>2</b> |
| V521    | <u>WP_000794589.1</u> | <b>1018</b> | 100 | 99,8  | - | - | <b><i>E509G</i></b> | <b><i>K703E</i></b> | -                  | - | <b>2</b> |
| SA943   | RAM46808.1            | 990         | 100 | 96,56 | - | - | <b><i>E509G</i></b> | <b><i>K703E</i></b> | + (4) <sup>1</sup> | - | <b>7</b> |

Note: S - signal sequence; Nv-N-terminus, variable region; Fg-fibrinogen and elastin-binding domain A; Fn - fibronectin-binding domain; PPR, proline-rich repeat region; C - C-terminus, including cell wall (W), membrane (M) and cytosolic region (C) attachment domains; <sup>1</sup> - amino acid substitutions: ***V936I***; ***A970V***; ***P975A***; ***K993N***.

**Supplementary Table S3b.** *Staphylococcus aureus* fibronectin-binding protein A (FnBPA): amino acid sequence: localization of deletions.

| Strain    | Protein<br>accession number | Protein regions |         |         |         |         |         |                      |         |
|-----------|-----------------------------|-----------------|---------|---------|---------|---------|---------|----------------------|---------|
|           |                             | S               | Nv      | Fn      |         |         |         | C<br>886-993         |         |
|           |                             | 1-23            | 115-119 | 763-800 | 876-878 | 879-902 | 880-918 | 898-925 <sup>1</sup> | 892-920 |
| NCTC 8325 | WP_000794582.1              | -               | -       | -       | -       | +       | -       | -                    | -       |
| Newman    | BAF68671.1                  | -               | -       | -       | -       | -       | -       | -                    | -       |
| Col       | WP_000794589.1              | -               | -       | -       | -       | +       | -       | -                    | -       |
| FPR3757   | WP_000794589.1              | -               | -       | -       | -       | +       | -       | -                    | -       |
| N315      | WP_000794614.1              | -               | -       | -       | -       | -       | -       | -                    | -       |
| MRSA252   | CAG41560.1                  | -               | -       | +       | +       | -       | +       | -                    | -       |
| MW2       | WP_000794648.1              | -               | +       | -       | -       | -       | -       | +                    | -       |
| 55/2053   | WP_000794642.1              | -               | -       | -       | +       | -       | -       | -                    | -       |
| Bmb9393   | AGP29431.1                  | -               | -       | -       | -       | +       | -       | -                    | -       |
| Be62      | WP_000794589.1              | -               | -       | -       | -       | +       | -       | -                    | -       |
| TW20      | CBI50487.1                  | +               | -       | -       | -       | +       | -       | -                    | -       |

|         |                |   |   |   |   |   |   |   |   |
|---------|----------------|---|---|---|---|---|---|---|---|
| JKD6008 | WP_000794589.1 | - | - | - | - | + | - | - | - |
| T0131   | WP_000794592.1 | - | - | - | - | + | - | - | + |
| Z172    | AGY90698.1     | + | - | - | - | + | - | - | + |
| V521    | WP_000794589.1 | - | - | - | - | + | - | - | - |
| SA943   | RAM46808.1     | - | - | - | - | + | - | - | + |

Note: - deletions are localized at the end of the fibronectin-binding region and capture the repeating region; <sup>1</sup> - the localization of this deletion in WP\_000794648<sup>1</sup> of *S. aureus* MW2 is indicated when it was aligned with WP\_000794614.1. The presence of deletions was marked with a cross on a light gray background.

**Supplementary Table S4.** *Staphylococcus aureus* SdrD amino acid sequence: localization of amino acid substitutions and deletions.

| Strain       | Protein<br>accession number | Number of<br>amino acids | Query<br>Cover<br>(%) | Per.<br>Ident<br>(%) | Number of amino acid substitutions in the structural domains<br>of the protein |             |                             |                                     |                    |                      | Number of<br>SD<br>dipeptides |
|--------------|-----------------------------|--------------------------|-----------------------|----------------------|--------------------------------------------------------------------------------|-------------|-----------------------------|-------------------------------------|--------------------|----------------------|-------------------------------|
|              |                             |                          |                       |                      | S<br>1-35                                                                      | A<br>36-550 | Spacer<br>region<br>551-559 | Subdomains<br>B (B1-B5)<br>560-1113 | R<br>1114-<br>1320 | WMC<br>1314-<br>1374 |                               |
| 1            | 2                           | 3                        | 4                     | 5                    | 6                                                                              | 7           | 8                           | 9                                   | 10                 | 11                   | 12                            |
| NCTC<br>8325 | SQF72859.1                  | 1349                     | 100                   | <b>97.32</b>         | -                                                                              | -           | -                           | 3                                   | 1                  | 2                    | 80                            |
| Newman       | WP_000934419.1              | 1315                     | <b>95</b>             | <b>99.92</b>         | -                                                                              | -           | -                           | -                                   | 1                  | -                    | 63                            |
| Col          | WP_000934424.1              | 1381                     | 100                   | 100                  | -                                                                              | -           | -                           | -                                   | -                  | -                    | 96                            |
| FPR3757      | WP_000934424.1              | 1381                     | 100                   | 100                  | -                                                                              | -           | -                           | -                                   | -                  | -                    | 96                            |
| N315         | WP_000934467.1              | 1385                     | <b>81</b>             | <b>93.77</b>         | -                                                                              | 62          | -                           | 2                                   | 1                  | -                    | 98                            |
| MW2          | WP_000934435.1              | 1347                     | 100                   | <b>96.16</b>         | -                                                                              | 13          | -                           | 3                                   | 1                  | -                    | 79                            |
| 55/2053      | AGT63464.1                  | 1360                     | <b>81</b>             | <b>82.77</b>         | -                                                                              | 151         | -                           | 17                                  | -                  | -                    | 93                            |
| Bmb9393      | AGP27562.1                  | 1381                     | 100                   | 100                  | -                                                                              | -           | -                           | -                                   | -                  | -                    | 96                            |
| Be62         | WP_000934424.1              | 1381                     | 100                   | 100                  | -                                                                              | -           | -                           | -                                   | -                  | -                    | 96                            |

|      |            |      |     |              |   |   |   |   |  |   |    |
|------|------------|------|-----|--------------|---|---|---|---|--|---|----|
| TW20 | CBI48511.1 | 1381 | 100 | <b>99.93</b> | - | 1 | - | 1 |  | - | 96 |
|------|------------|------|-----|--------------|---|---|---|---|--|---|----|

**Supplementary Table S4.** *Staphylococcus aureus* SdrD amino acid sequence: localization of amino acid substitutions and deletions (continued).

| 1       | 2              | 3    | 4   | 5            | 6 | 7 | 8 | 9 | 10 | 11 | 12 |
|---------|----------------|------|-----|--------------|---|---|---|---|----|----|----|
| JKD6008 | WP_000934423.1 | 1375 | 100 | <b>97.57</b> | - | - | - | - | -  | -  | 93 |
| T0131   | WP_000934424.1 | 1381 | 100 | 100          | - | - | - | - | -  | -  | 96 |
| Z172    | AGY88666.1     | 1369 | 100 | <b>98.99</b> | - | - | - | 1 | 1  | -  | 90 |
| V521    | WP_063655687.1 | 1375 | 100 | <b>99.42</b> | - | 1 | - | 1 | 1  | -  | 93 |
| SA943   | RAM46169.1     | 1381 | 100 | 100          | - | - | - | - | -  | -  | 96 |
| MRSA252 | No protein     | -    | -   | -            | - | - | - | - | -  | -  | -  |

Note: S - N- terminal signal sequence; A - domain with ligand binding N2/N3 subdomains; B1-B5 - recurring B subdomains; R - serine-aspartate dipeptide region; WMC - wall-spanning segment.

**Supplementary Table S5.** *Staphylococcus aureus* SdrE amino acid sequence: localization of amino acid substitutions and deletions.

| Strain               | Protein accession number | Aa number | Query cover (%) | Per. ident (%) | Amino acid substitutions |          |          |          |          |          |          |          |          |          |          |          |          |          |
|----------------------|--------------------------|-----------|-----------------|----------------|--------------------------|----------|----------|----------|----------|----------|----------|----------|----------|----------|----------|----------|----------|----------|
|                      |                          |           |                 |                | Protein region           |          |          |          |          |          |          |          |          |          |          |          |          |          |
|                      |                          |           |                 |                | A                        |          |          |          |          |          |          |          |          |          |          |          |          |          |
|                      |                          |           |                 |                | 78                       | 87       | 106      | 110      | 115      | 160      | 227      | 240      | 244      | 261      | 285      | 385      | 396      | 397      |
| Col                  | AAW37719.1               | 1166      | 100             | 100            | T                        | N        | K        | S        | K        | N        | <b>K</b> | S        | H        | V        | K        | S        | K        | T        |
| Newman               | BAF66797.1               | 1166      | 100             | <b>99.91</b>   | T                        | N        | K        | S        | K        | N        | <b>N</b> | S        | H        | V        | K        | S        | K        | T        |
| FPR3757              | ABD22410.1               | 1154      | 100             | <b>98.80</b>   | T                        | N        | K        | S        | K        | N        | <b>N</b> | S        | H        | V        | K        | S        | K        | T        |
| N315 <sup>1</sup>    | BAB41752.1               | 1141      | 100             | <b>97.72</b>   | T                        | <b>D</b> | <b>E</b> | <b>T</b> | <b>Q</b> | <b>Y</b> | <b>N</b> | <b>N</b> | <b>R</b> | <b>L</b> | <b>T</b> | <b>A</b> | <b>Q</b> | <b>A</b> |
| MRSA252 <sup>1</sup> | CAG39588.1               | 1137      | 80              | <b>83.94</b>   | T                        | <b>D</b> | <b>E</b> | <b>P</b> | <b>Q</b> | N        | <b>N</b> | S        | <b>R</b> | V        | <b>T</b> | <b>A</b> | K        | <b>E</b> |
| MW2 <sup>1</sup>     | BAB94383.1               | 1141      | 100             | <b>98.95</b>   | <b>A</b>                 | <b>D</b> | <b>E</b> | <b>K</b> | <b>Q</b> | N        | <b>N</b> | S        | H        | V        | K        | S        | K        | T        |
| 55/2053              | No protein               | -         | -               | -              | -                        | -        | -        | -        | -        | -        | -        | -        | -        | -        | -        | -        | -        | -        |
| Bmb9393              | AGP27563.1               | 1161      | 100             | <b>99.40</b>   | T                        | N        | K        | S        | K        | N        | <b>N</b> | S        | H        | V        | K        | S        | K        | T        |
| Be62                 | ALY22396.1               | 1161      | 100             | <b>99.40</b>   | T                        | N        | K        | S        | K        | N        | <b>N</b> | S        | H        | V        | K        | S        | K        | T        |
| TW20                 | CBI48512.1               | 1137      | 100             | <b>97.34</b>   | T                        | N        | K        | S        | K        | N        | <b>N</b> | S        | H        | V        | K        | S        | K        | T        |
| JKD6008              | ADL64631.1               | 1133      | 100             | <b>97.00</b>   | T                        | N        | K        | S        | K        | N        | <b>N</b> | S        | H        | V        | K        | S        | K        | T        |

|       |            |      |     |              |   |   |   |   |   |   |          |   |   |   |   |   |   |   |
|-------|------------|------|-----|--------------|---|---|---|---|---|---|----------|---|---|---|---|---|---|---|
| T0131 | AEB87697.1 | 1131 | 100 | <b>96.83</b> | T | N | K | S | K | N | <i>N</i> | S | H | V | K | S | K | T |
| Z172  | n/d        | -    | -   | -            | - | - | - | - | - | - | -        | - | - | - | - | - | - | - |
| V521  | AND35210.1 | 1137 | 100 | <b>97.34</b> | T | N | K | S | K | N | <i>N</i> | S | H | V | K | S | K | T |
| SA943 | RAM46170.1 | 1029 | 100 | <b>99.18</b> | T | N | K | S | K | N | <i>N</i> | S | H | V | K | S | K | T |



**Supplementary Table S5.** *Staphylococcus aureus* SdrE amino acid sequence: localization of amino acid substitutions and deletions (continued).

| Strain               | Protein accession number | Amino acid substitutions |          |          |          |          |          |               |          |          |               |          |               |          | Deletions / localization |                                                 |                       |
|----------------------|--------------------------|--------------------------|----------|----------|----------|----------|----------|---------------|----------|----------|---------------|----------|---------------|----------|--------------------------|-------------------------------------------------|-----------------------|
|                      |                          | Protein region           |          |          |          |          |          |               |          |          |               |          |               |          | Protein region           |                                                 |                       |
|                      |                          | A                        |          |          |          |          |          | B1<br>606-719 |          |          | B2<br>720-829 |          | B3<br>830-939 |          | A                        | R                                               | C                     |
|                      |                          | 420                      | 444      | 460      | 501      | 502      | 594      | 655           | 677      | 699      | 800           | 823      | 858           | 862      | 174-178 <sup>3</sup>     | number of SD repeats/<br>(-number of deletions) |                       |
| Col                  | AAW37719.1               | T                        | D        | S        | S        | D        | T        | N             | T        | V        | D             | R        | T             | Q        | -                        | 83/0                                            | -                     |
| Newman               | BAF66797.1               | T                        | D        | S        | S        | D        | T        | N             | T        | V        | D             | R        | T             | Q        | -                        | 83/0                                            | -                     |
| FPR3757              | ABD22410.1               | T                        | D        | S        | S        | D        | T        | N             | T        | V        | D             | S        | T             | Q        | -                        | 77/ (-6)                                        | -                     |
| N315 <sup>1</sup>    | BAB41752.1               | <b>S</b>                 | <b>N</b> | <b>T</b> | <b>P</b> | <b>N</b> | <b>S</b> | N             | <b>A</b> | <b>I</b> | <b>E</b>      | <b>S</b> | <b>K</b>      | <b>L</b> | +                        | 73/ (-10)                                       | -                     |
| MRSA252 <sup>1</sup> | CAG39588.1               | <b>K</b>                 | <b>T</b> | <b>N</b> | S        | <b>G</b> | <b>S</b> | N             | <b>A</b> | V        | <b>E</b>      | <b>S</b> | T             | Q        | +                        | 71/ (-12)                                       | -                     |
| MW2 <sup>1</sup>     | BAB94383.1               | T                        | D        | S        | S        | D        | T        | <b>K</b>      | T        | V        | <b>E</b>      | <b>S</b> | T             | Q        | +                        | 73/ (-10)                                       | -                     |
| 55/2053              | No protein               | -                        | -        | -        | -        | -        | -        | -             | -        | -        | -             | -        | -             | -        | -                        | -                                               | -                     |
| Bmb 9393             | AGP27563.1               | T                        | D        | S        | S        | D        | T        | N             | T        | V        | D             | <b>S</b> | T             | Q        | +                        | 83 / (0)                                        | -                     |
| Be62                 | ALY22396.1               | T                        | D        | S        | S        | D        | T        | N             | T        | V        | D             | <b>S</b> | T             | Q        | +                        | 83 / (0)                                        | -                     |
| TW20                 | CBI48512.1               | T                        | D        | S        | S        | D        | T        | N             | T        | V        | D             | R        | T             | Q        | +                        | 71/ (-12)                                       | -                     |
| JKD6008              | ADL64631.1               | T                        | D        | S        | S        | D        | T        | N             | T        | V        | D             | <b>S</b> | T             | Q        | +                        | 69/ (-14)                                       | -                     |
| T0131                | AEB87697.1               | T                        | D        | S        | S        | D        | T        | N             | T        | V        | D             | <b>S</b> | T             | Q        | +                        | 68/ (-15)                                       | -                     |
| Z172                 | n/d                      | ?                        | ?        | ?        | ?        | ?        | ?        | ?             | ?        | ?        | ?             | ?        | ?             | ?        | ?                        | ?                                               | ?                     |
| V521                 | AND35210.1               | T                        | D        | S        | S        | D        | T        | N             | T        | V        | D             | <b>S</b> | T             | Q        | +                        | 71/ (-12)                                       | <b>18<sup>2</sup></b> |
| SA943                | RAM46170.1               | T                        | D        | S        | S        | D        | T        | N             | T        | V        | D             | <b>S</b> | T             | Q        | +                        | 17/ (-66)                                       | -                     |

Note: The SdrE regions: ligand-binding domain A; subdomains B1-3(function is unknown); R-region, containing Ser-Asp dipeptides; C-terminal end, that is involved in the protein attachment to the bacterial cell wall; <sup>1</sup> - bone sialoprotein-binding protein, that is allelic variant of SdrE; *S. aureus* MRSA252 carries more than 60 amino acid substitution additionally; <sup>2</sup>- the number of amino acids that have been lost; <sup>3</sup>- deletions of 5 amino acids: TSEPS.

**Supplementary Table S6.** *Staphylococcus aureus* hemolysins/leucocidins amino acid sequence.

| Strain    | Toxin/ number of amino acids (aa) |                |                          | Toxin/ number of amino acids (aa) |                |                  | Toxin/ number of amino acids (aa) |                |                  |
|-----------|-----------------------------------|----------------|--------------------------|-----------------------------------|----------------|------------------|-----------------------------------|----------------|------------------|
|           | Hla /319 aa                       |                |                          | LukED subunit E/311aa             |                |                  | LukED subunit D/327 aa            |                |                  |
|           | Protein accession number          | Per. Ident (%) | Aa substitutions         | Protein accession number          | Per. Ident (%) | Aa substitutions | Protein accession number          | Per. Ident (%) | Aa substitutions |
| NCTC 8325 | WP_000857483.1                    | 100            | no                       | WP_000473596.1                    | 100            | no               | WP_000782464.1                    | 100            | no               |
| Newman    | WP_000857483.1                    | 100            | no                       | WP_000473596.1                    | 100            | no               | WP_000782464.1                    | 100            | no               |
| Col       | WP_000857483.1                    | 100            | no                       | WP_000473596.1                    | 100            | no               | WP_000782464.1                    | 100            | no               |
| FPR3757   | WP_000857483.1                    | 100            | no                       | WP_000473596.1                    | 100            | no               | WP_000782464.1                    | 100            | no               |
| N315      | WP_000857488.1                    | <b>99.37</b>   | <b>D234E;<br/>I301T</b>  | WP_000473596.1                    | 100            | no               | WP_000782463.1                    | <b>99.69</b>   | <b>V287T</b>     |
| MW2       | WP_000857485.1                    | <b>99.69</b>   | <b>I301T</b>             | WP_000473596.1                    | 100            | no               | WP_000782464.1                    | 100            | no               |
| MRSA252   | CAG40139.1 <sup>1</sup>           | -              | -                        | n/d                               | n/d            | n/d              | n/d                               | n/d            | n/d              |
| 55/2053   | EEV04322.1                        | <b>98.43</b>   | <b>78 I/L;<br/>I301T</b> | n/d                               | n/d            | n/d              | n/d                               | n/d            | n/d              |
| TW20      | WP_000857484.1                    | <b>99.69</b>   | <b>R4T</b>               | WP_000473590.1                    | <b>99,68</b>   | G154A            | WP_000782464.1                    | 100            | no               |
| T0131     | WP_000857484.1                    | <b>99.69</b>   | <b>R4T</b>               | WP_000473596.1                    | 100            | no               | AEB88916.1 <sup>2</sup>           | <b>85/100</b>  |                  |

|         |                |              |            |                |              |       |                |     |    |
|---------|----------------|--------------|------------|----------------|--------------|-------|----------------|-----|----|
| Z172    | WP_000857484.1 | <b>99.69</b> | <b>R4T</b> | WP_000473590.1 | <b>99,68</b> | G154A | WP_000782464.1 | 100 | no |
| V521    | WP_000857485.1 | <b>99.68</b> | <b>R4T</b> | AND36441.1     | <b>99,68</b> | G154A | AND36440.1     | 100 | no |
| Bmb9393 | WP_000857484.1 | <b>99.69</b> | <b>R4T</b> | WP_000473596.1 | 100          | no    | WP_000782464.1 | 100 | no |
| Be62    | WP_000857484.1 | <b>99.69</b> | <b>R4T</b> | ALY23745.1     | <b>100</b>   | no    | ALY23744.1     | 100 | no |
| JKD6008 | WP_000857484.1 | <b>99.69</b> | <b>R4T</b> | ?              | <b>?</b>     | ?     | ?              | ?   | ?  |
| 943     | RAM45765.1     | <b>99.69</b> | <b>R4T</b> | RAM45662.1     | 100          | no    | RAM45663.1     | 100 | no |

**Supplementary Table S6.** *Staphylococcus aureus* hemolysins/leucocidins amino acid sequence (continued).

| Strain    | Toxin/ number of amino acids (aa) |                |                                             | Toxin/ number of amino acids (aa) |                |                  | Toxin/ number of amino acids (aa) |                |                               |
|-----------|-----------------------------------|----------------|---------------------------------------------|-----------------------------------|----------------|------------------|-----------------------------------|----------------|-------------------------------|
|           | Gamma-hemolysin subunit A/309 aa  |                |                                             | Gamma-hemolysin subunit B/325 aa  |                |                  | Gamma-hemolysin C/319 aa          |                |                               |
|           | Protein accession number          | Per. Ident (%) | Aa substitutions                            | Protein accession number          | Per. Ident (%) | Aa substitutions | Protein accession number          | Per. Ident (%) | Aa substitutions              |
| NCTC 8325 | WP_000594519.1                    | 100            | no                                          | WP_000783428.1                    | 100            | no               | WP_000916713.1                    | 100            | no                            |
| Newman    | WP_000594519.1                    | 100            | no                                          | WP_000783428.1                    | 100            | no               | WP_000916713.1                    | 100            | no                            |
| Col       | WP_000594519.1                    | 100            | no                                          | WP_000783428.1                    | 100            | no               | ?                                 |                | no                            |
| FPR3757   | WP_000594519.1                    | 100            | no                                          | WP_000783428.1                    | 100            | no               | WP_000916713.1                    | 100            | no                            |
| N315      | WP_000594519.1                    | 100            | no                                          | WP_000783428.1                    | 100            | no               | WP_000916704.1                    | <b>99.68</b>   | <b><i>T8A</i></b>             |
| MW2       | WP_000594519.1                    | 100            | no                                          | WP_000783428.1                    | 100            | no               | WP_000916704.1                    | <b>99.68</b>   | <b><i>T8A</i></b>             |
| MRSA252   | WP_000594517.1                    | <b>99.35</b>   | <b><i>R246K;</i></b><br><b><i>A264T</i></b> | WP_000783428.1                    | 100            | no               | CAG41490.1                        | <b>97.78</b>   | <b><i>T8A<sup>t</sup></i></b> |

|         |                         |              |                     |                |              |                                                                          |               |              |                               |
|---------|-------------------------|--------------|---------------------|----------------|--------------|--------------------------------------------------------------------------|---------------|--------------|-------------------------------|
| 55/2053 | EEV05022.1 <sup>3</sup> | <b>99.68</b> | <b><i>E241K</i></b> | WP_001056917.1 | <b>97.54</b> | <b><i>K2N; G22N;<br/>T82A; F89Y;<br/>V90E; K91R;<br/>N95K; L102T</i></b> | EEV05023.1    | <b>97.78</b> | <b><i>T8A<sup>4</sup></i></b> |
| TW20    | WP_000594519.1          | 100          | no                  | WP_000783428.1 | 100          | no                                                                       | WP_00096713.1 | 100          | no                            |
| To131   | WP_000594519.1          | 100          | no                  | WP_000783428.1 | 100          | no                                                                       | WP_00096713.1 | 100          | no                            |
| Z172    | WP_000594519.1          | 100          | no                  | WP_000783428.1 | 100          | no                                                                       | WP_00096713.1 | 100          | no                            |
| V521    | AND37622.1              | 100          | no                  | AND37245.1     | 100          | no                                                                       | AND37244.1    | 100          | no                            |
| Bmb9393 | WP_000594519.1          | 100          | no                  | WP_000783428.1 | 100          | no                                                                       | WP_00096713.1 | 100          | no                            |
| Be62    | ALY24329.1 <sup>3</sup> | 100          | no                  | ALY24332.1     | 100          | no                                                                       | ALY24331.1    | 100          | no                            |
| JKD6008 | WP_000594519.1          | 100          | no                  | WP_000783428.1 | 100          | no                                                                       | WP_00096713.1 | 100          | no                            |
| 943     | RAM47209.1              | 100          | no                  | RAM47121.1     | 100          | no                                                                       | RAM47120.1    | 100          | no                            |

**Supplementary Table S6.** *Staphylococcus aureus* hemolysins/leucocidins amino acid sequence (continued).

| Strain       | Toxin/ number of amino acid (aa) |                          |                     | Toxin/ number of amino acid (aa) |                   |                     | Toxin/ number of amino acid (aa) |                   |                          |
|--------------|----------------------------------|--------------------------|---------------------|----------------------------------|-------------------|---------------------|----------------------------------|-------------------|--------------------------|
|              | LukGH subunit G/338aa            |                          |                     | LukGH subunit H/ 351aa           |                   |                     | Hemolysin III /227aa             |                   |                          |
|              | Protein<br>accession number      | Per. Ident<br>(%)        | Aa<br>substitutions | Protein accession<br>number      | Per. Ident<br>(%) | Aa<br>substitutions | Protein accession<br>number      | Per. Ident<br>(%) | Aa<br>substitu-<br>tions |
| NCTC<br>8325 | WP_000595324.1                   | 100                      | no                  | WP_000791407.1                   | 100               | no                  | WP_000047255.1                   | 100               | no                       |
| Newman       | WP_000595324.1                   | 100                      | no                  | WP_000791407.1                   | 100               | no                  | WP_000047255.1                   | 100               | no                       |
| Col          | WP_000595324.1                   | 100                      | no                  | WP_000791407.1                   | 100               | no                  | WP_000047255.1                   | 100               | no                       |
| FPR3757      | WP_000595324.1                   | 100                      | no                  | WP_000791407.1                   | 100               | no                  | WP_000047255.1                   | 100               | no                       |
| N315         | WP_000595392.1                   | <b>97.34<sup>5</sup></b> | <b>8</b>            | WP_000791410.1                   | 100               | no                  | WP_000047255.1                   | 100               | no                       |
| MW2          | n/d                              | n/d                      | n/d                 | n/d                              | n/d               | n/d                 | WP_000047255.1                   | 100               | no                       |
| MRSA252      | n/d                              | n/d                      | n/d                 | n/d                              | n/d               | n/d                 | WP_000047120.1                   | <b>98.68</b>      | <b><i>T4S; E5K</i></b>   |
| 55/2053      | n/d                              | n/d                      | n/d                 | n/d                              | n/d               | n/d                 | WP_000047120.1                   | <b>98.68</b>      | <b><i>T4S; E5K</i></b>   |
| TW20         | WP_000595324.1                   | 100                      | no                  | WP_000791407.1                   | 100               | no                  | WP_000047255.1                   | 100               | no                       |
| To131        | WP_000595324.1                   | 100                      | no                  | WP_000791407.1                   | 100               | no                  | WP_000047255.1                   | 100               | no                       |

|         |                |             |                     |                |     |    |                |              |                    |
|---------|----------------|-------------|---------------------|----------------|-----|----|----------------|--------------|--------------------|
| Z172    | WP_000595324.1 | 100         | no                  | WP_000791407.1 | 100 | no | WP_000047255.1 | 100          | no                 |
| V521    | WP_000595324.1 | 100         | no                  | AND36691.1     | 100 | no | AND36982.1     | 100          | no                 |
| Bmb9393 | n/d            | n/d         | n/d                 | WP_000791407.1 | 100 | no | WP_000047255.1 | 100          | no                 |
| Be62    | ALY23926.1     | 100         | no                  | ALY2396.7      | 100 | no | ALY24076.1     | 100          | no                 |
| JKD6008 | WP_000595323.1 | <b>99.7</b> | <b><i>K308E</i></b> | WP_000791407.1 |     | no | WP_000047255.1 | 100          | no                 |
| 943     | RAM45196.1     | <b>100</b>  | no                  | RAM45195.1     | 100 | no | RAM45352.1     | <b>99.56</b> | <b><i>I96T</i></b> |

Note: <sup>1</sup>- pseudogene due to the presence of a stop codon at position 112; <sup>2</sup>- length 281 aa as a result of deletion of a fragment of 46 aa, starting from aa 282; <sup>3</sup>- length 321 aa as a result of insertion 12 aa at the beginning of the sequence; <sup>4</sup>- amino acid substitutions were identified additionally: ***S40N***; ***I42V***; ***V92K***; ***K96N***; ***V100I***; ***A102S***; <sup>5</sup>- amino acid substitutions were identified: ***C6Y***; ***T13S***; ***L16I***; ***T19A***; ***F20L***; ***F23Y***; ***Q32A***; ***N325D***.

**Supplementary Table S7.** *Staphylococcus aureus* PSM peptides amino acid sequence.

| Strain    | Peptide accession number / number of amino acids (aa) |                |                |                |                |                |
|-----------|-------------------------------------------------------|----------------|----------------|----------------|----------------|----------------|
|           | Alpha-1/21aa                                          | Alpha-2/21aa   | Alpha-3/22aa   | Alpha-4/20aa   | Beta-1/44aa    | Beta-2/44aa    |
| NCTC 8325 | P0C7Y1.1                                              | P0C7Z3.1       | P0C805.1       | n/d            | WP_000147103.1 | Wp_000398672.1 |
| Newman    | WP_014373781.1                                        | WP_014373780.1 | WP_014373779.1 | WP_014532416.1 | WP_000147103.1 | Wp_000398672.1 |
| Col       | WP_014373781.1                                        | WP_014373780.1 | WP_014373779.1 | WP_014532416.1 | WP_000147103.1 | Wp_000398672.1 |
| FPR3757   | WP_014373781.1                                        | WP_014373780.1 | WP_014373779.1 | WP_014532416.1 | WP_000147103.1 | Wp_000398672.1 |
| N315      | WP_014373781.1                                        | WP_014373780.1 | WP_014373779.1 | WP_014532416.1 | WP_000147103.1 | Wp_000398672.1 |
| MW2       | WP_014373781.1                                        | WP_014373780.1 | WP_014373779.1 | WP_014532416.1 | WP_000147103.1 | Wp_000398672.1 |
| MRSA252   | Wp_014373781.1                                        | WP_014373780.1 | WP_099119694.1 | WP_014532416.1 | n/d            | Wp_000398672.1 |
| T0131     | WP_014373781.1                                        | WP_014373780.1 | WP_014373779.1 | WP_014532416.1 | WP_000147103.1 | Wp_000398672.1 |
| 55/2053   | WP_014373781.1                                        | WP_014373780.1 | n/d            | n/d            | n/d            | n/d            |
| TW20      | WP_014373781.1                                        | WP_014373780.1 | WP_014373779.1 | WP_014532416.1 | WP_000147103.1 | Wp_000398672.1 |
| Z172      | WP_014373781.1                                        | WP_014373780.1 | WP_014373779.1 | WP_014532416.1 | WP_000147103.1 | n/d            |
| V521      | n/d                                                   | n/d            | n/d            | n/d            | n/d            | n/d            |
| Bmb9393   | WP_014373781.1                                        | WP_014373780.1 | WP_014373779.1 | n/d            | WP_000147103.1 | Wp_000398672.1 |
| Be62      | n/d                                                   | n/d            | n/d            | n/d            | n/d            | n/d            |
| JKD6008   | WP_014373781.1                                        | Wp_014373780.1 | Wp_14373779.1  | Wp_014532416.1 | Wp_000147103.1 | Wp_000398672.1 |
| SA943     | RAM45730.1                                            | RAM45731.1     | RAM45732.1     | RAM45733.1     | RAM45753.1     | RAM45754.1     |



**Supplementary Table S7.** *Staphylococcus aureus* PSM peptides amino acid sequence (continued).

| Strain   | Peptide accession number / number of amino acids (aa) |                          |                                     |                |                |                |
|----------|-------------------------------------------------------|--------------------------|-------------------------------------|----------------|----------------|----------------|
|          | Delta-lysin/44aa                                      | PSM <sub>mec</sub> /22aa | Transport proteins for PSM peptides |                |                |                |
|          |                                                       |                          | PmtA/298 aa                         | PmtB/226 aa    | PmtC/240 aa    | PmtD/246 aa    |
| NCTC8325 | WP_001549197.1                                        | no                       | WP_000991302.1                      | WP_000645727.1 | WP_000763048.1 | WP_001221651.1 |
| Newman   | WP_001549197.1                                        | no                       | WP_000991302.1                      | WP_000645727.1 | WP_000763048.1 | WP_001221651.1 |
| Col      | WP_001549197.1                                        | no                       | WP_000991302.1                      | WP_000645727.1 | WP_000763048.1 | WP_001221651.1 |
| FPR3757  | WP_001549197.1                                        | no                       | WP_000991302.1                      | WP_000645727.1 | WP_000763048.1 | WP_001221651.1 |
| N315     | WP_001549197.1                                        | WP_014532405.1           | <u>WP_000991306.1</u>               | WP_000645727.1 | WP_000763043.1 | WP_001221651.1 |
| MW2      | WP_001823225.1                                        | no                       | n/d                                 | n/d            | WP_000763048.1 | WP_001221657.1 |
| MRSA252  | CAG41103.1<br>(45aa)                                  | WP_014532405.1           | n/d                                 | n/d            | WP_000763048.1 | n/d            |
| T0131    | WP_001549197.1                                        | WP_014532405.1           | <u>WP_000991302.1</u>               | WP_000645727.1 | WP_000763048.1 | WP_001221651.1 |
| 55/2053  | WP_001549197.1                                        | no                       | n/d                                 | n/d            | WP_000763048.1 | n/d            |
| TW20     | WP_001549197.1                                        | WP_014532405.1           | WP_000991302.1                      | WP_000645727.1 | WP_000763048.1 | WP_001221651.1 |
| Z172     | WP_001549197.1                                        | WP_014532405.1           | WP_000991302.1                      | WP_000645727.1 | WP_000763048.1 | WP_001221651.1 |
| V521     | n/d                                                   | n/d                      | n/d                                 | n/d            | n/d            | n/d            |
| Bmb9393  | WP_001549197.1                                        | WP_014532405.1           | WP_000991302.1                      | WP_000645727.1 | WP_000763048.1 | WP_001221651.1 |
| Be62     | n/d                                                   | n/d                      | n/d                                 | n/d            | n/d            | n/d            |
| JKD6008  | WP_001549197.1                                        | WP_014532405.1           | WP_000991302.1                      | WP_000645727.1 | WP_000763048.1 | WP_001221651.1 |
| SA943    | RAM45554.1                                            | RAM45233.1               | RAM45801.1                          | RAM45802.1     | RAM45803.1     | RAM45804.1     |

**Supplementary Table S8.** The Agr locus proteins amino acid sequence.

| Strain           | AgrA                     |                             | AgrB                       |                             |                                    |                                       | AgrD                           |                             |                                    |                                            |
|------------------|--------------------------|-----------------------------|----------------------------|-----------------------------|------------------------------------|---------------------------------------|--------------------------------|-----------------------------|------------------------------------|--------------------------------------------|
|                  | Protein accession number | Num-ber of amino acids (aa) | Protein accession number   | Num-ber of amino acids (aa) | Query Cover (%)/<br>Per. Ident (%) | Num-ber of amino acids substitu-tions | Protein accession number       | Num-ber of amino acids (aa) | Query Cover (%)/<br>Per. Ident (%) | Num-ber of amino acids substi-tutions (aa) |
| NCTC 8325        | WP_000688492.1           | 238                         | WP_001105707.1             | 189                         | 100/100                            | no                                    | WP_001093929.1                 | 46                          | 100/100                            | no                                         |
| Newman           | WP_000688492.1           | 238                         | WP_001105707.1             | 189                         | 100/100                            | no                                    | WP_001093929.1                 | 46                          | 100/100                            | no                                         |
| Col <sup>1</sup> | WP_000688492.1           | 238                         | WP_001105707.1             | 189                         | 100/100                            | no                                    | WP_001093929.1                 | 46                          | 100/100                            | no                                         |
| FPR3757          | WP_000688492.1           | 238                         | WP_001105707.1             | 189                         | 100/100                            | no                                    | WP_001093929.1                 | 46                          | 100/100                            | no                                         |
| N315             | WP_000688492.1           | 238                         | WP_001105696.1             | 187                         | <b>100/63.43</b>                   | <b>74</b>                             | WP_001094921.1                 | 47                          | <b>97/47.83</b>                    | <b>25</b>                                  |
| MW2              | WP_000688492.1           | 238                         | <u>WP_001105705.1</u>      | 187                         | <b>100/79.14</b>                   | <b>39</b>                             | WP_001093929.1                 | 46                          | 100/100                            | no                                         |
| 55/2053          | WP_000688492.1           | 238                         | WP_001105709.1             | 187                         | <b>100/78.07</b>                   | <b>41</b>                             | WP_000735197.1                 | 46                          | <b>100/52.17</b>                   | <b>22</b>                                  |
| MRSA252          | WP_00688492.1            | 238                         | <u>WP_001105709.1</u>      | 187                         | <b>100/78.07</b>                   | <b>41</b>                             | <u>WP_000735197.1</u>          | 46                          | 100/100                            | no                                         |
| T0131            | WP_000688492.1           | 238                         | WP_001105707.1             | 189                         | 100/100                            | no                                    | WP_001093929.1                 | 46                          | 100/100                            | no                                         |
| TW20             | WP_000688492.1           | 238                         | WP_001105707.1             | 189                         | 100/100                            | no                                    | WP_001093929.1                 | 46                          | 100/100                            | no                                         |
| JKD6008          | WP_000688492.1           | 238                         | WP_001105707.1             | 189                         | 100/100                            | no                                    | WP_001093929.1                 | 46                          | 100/100                            | no                                         |
| Z172             | WP_000688492.1           | 238                         | WP_001105707.1             | 189                         | 100/100                            | no                                    | WP_001093929.1                 | 46                          | 100/100                            | no                                         |
| V521             | AND36710.1               | 259 <sup>2</sup>            | WP_001105707.1             | 189                         | 100/100                            | no                                    | <u>AND36708.1</u>              | 46                          | 100/100                            | no                                         |
| Bmb9393          | WP_000688492.1           | 238                         | <a href="#">AGP28987.1</a> | 207                         | <b>91/99.47<sup>3</sup></b>        | <b>1</b>                              | WP_001093929.1                 | 46                          | 100/100                            | no                                         |
| Be62             | WP_000688492.1           | 238                         | ALY23941.1                 | 207                         | <b>91/99.47<sup>3</sup></b>        | <b>1</b>                              | <a href="#">WP_001093929.1</a> | 46                          | 100/100                            | no                                         |
| SA943            | RAM 45557.1              | 238                         | RAM 45555.1                | 189                         | 100/100                            | no                                    | RAM45556.1                     | 46                          | 100/100                            | no                                         |

**Supplementary Table S8.** The Agr locus proteins amino acid sequence (continued).

| Strain           | AgrC                         |                            |                                 |                                                                                                                                                         |
|------------------|------------------------------|----------------------------|---------------------------------|---------------------------------------------------------------------------------------------------------------------------------------------------------|
|                  | Protein accession number     | Number of amino acids (aa) | Query Cover (%) / Per.Ident (%) | Substitutions/ deletions/ incisions (aa)                                                                                                                |
| NCTC8325         | YP_500745.1                  | <b>414</b>                 | 100/ <b>99.76</b>               | <b>P247T</b> ; deletion 1-16                                                                                                                            |
| Newman           | WP_001554031.1               | 430                        | 100/ <b>99.77</b>               | <b>P247T</b>                                                                                                                                            |
| Col <sup>1</sup> | WP_010956571.1               | 430                        | 100/100                         | no                                                                                                                                                      |
| FPR3757          | WP_001549202.1               | 430                        | 100/ <b>99.53</b>               | <b>P247T</b> ; <b>I309F</b>                                                                                                                             |
| N315             | BAB43125.1                   | <b>371</b>                 | <b>98/73.35</b>                 | Region 69-204: 98 substitutions; deletions: 1-66;427-430; incision: 1-7                                                                                 |
| MW2              | WP_000387809.1               | 430                        | 100/ <b>76.51</b>               | Region 1-204: 91 substitutions;<br>further: <b>P247T</b> ; <b>P258T</b> ; <b>I280L</b> ; <b>I297L</b> ; <b>S320T</b> ; <b>S321R</b> ; <b>345 T/S</b>    |
| 55/2053          | WP_000387809.1               | 430                        | 100/ <b>76.51</b>               | Регион 1-204: 91 substitutions;<br>further: <b>P247T</b> ; <b>P258T</b> ; <b>I280L</b> ; <b>I297L</b> ; <b>S320T</b> ; <b>S321R</b> ; <b>T345S</b>      |
| MRSA252          | WP_000387814.1               | 430                        | 100/ <b>76.51</b>               | Region 1-204: 92 substitutions;<br>further: <b>247 P/T</b> ; <b>258 P/T</b> ; <b>I280L</b> ; <b>I297L</b> ; <b>S320T</b> ; <b>S321R</b> ; <b>345T/S</b> |
| T0131            | AEB89137.1                   | <b>233</b>                 | 100/ <b>99.1</b>                | Deletions 1-207, substitutions: <b>247 P /T</b> ; <b>311 I/T</b>                                                                                        |
| TW20             | CBI49894.1<br>WP_014532426.1 | 430                        | 100/ <b>99.53</b>               | <b>S6R</b> ; <b>P247T</b>                                                                                                                               |
| JKD6008          | WP_001554031.1               | 430                        | 100/ <b>99.77</b>               | <b>P247T</b> ;                                                                                                                                          |
| Z172             | WP_014532426.1               | 430                        | 100/ <b>99.53</b>               | <b>S6R</b> ; <b>P247T</b> ;                                                                                                                             |
| V521             | WP_014532426.1               | 430                        | 100/ <b>99.53</b>               | <b>6 S/R</b> ; <b>P247T</b> ;                                                                                                                           |
| Bmb9393          | WP_001554031.1               | 430                        | 100/ <b>99.77</b>               | <b>P247T</b> ;                                                                                                                                          |
| Be62             | WP_001554031.1               | 430                        | 100/ <b>99.77</b>               | <b>P247T</b> ;                                                                                                                                          |
| SA943            | RAM45580.1                   | <b>414</b>                 | 100/ <b>99.52</b>               | <b>P247T</b> ; <b>I311T</b> ; <b>A343T</b> ; deletion 1-16                                                                                              |

Note: <sup>1</sup> - the analysis was carried out by align to the reference sequence of the protein in strain Col; <sup>2</sup> - the first 237 amino acids are identical, the C-terminal end contains an additional 22 amino acids; <sup>3</sup>- Insertion 1-18aa and substitution **MIL** were identified.

**Supplementary Table S9.** *Staphylococcus aureus* SarA locus proteins amino acid sequence: localization of amino acid substitutions and deletions.

| Strain    | Sar A                    |                 |                | Sar R                    |                 |                | Sar S (SarH1)            |                 |                |                  | SarT                     |                 |                |                  |
|-----------|--------------------------|-----------------|----------------|--------------------------|-----------------|----------------|--------------------------|-----------------|----------------|------------------|--------------------------|-----------------|----------------|------------------|
|           | Protein accession number | Aa <sup>1</sup> | Per. Ident (%) | Protein accession number | Aa <sup>1</sup> | Per. Ident (%) | Protein accession number | Aa <sup>1</sup> | Per. Ident (%) | Aa substitutions | Protein accession number | Aa <sup>1</sup> | Per. Ident (%) | Aa substitutions |
| NCTC 8325 | WP_001018677.1           | 124             | 100            | WP_000036076.1           | 115             | 100            | WP_000876758.1           | 250             | 100            | no               | SQF74841.1               | 118             | 100            | no               |
| Newman    | WP_001018677.1           | 124             | 100            | WP_000036076.1           | 115             | 100            | WP_000876758.1           | 250             | 100            | no               | WP_000998869.1           | 118             | 100            | no               |
| Col       | WP_001018677.1           | 124             | 100            | WP_000036076.1           | 115             | 100            | AAW38739.1               | 250             | 99.20          | D221N<br>D243N   | WP_000998869.1           | 118             | 100            | no               |
| FPR3757   | WP_001018677.1           | 124             | 100            | WP_000036076.1           | 115             | 100            | WP_000876758.1           | 250             | 100            | no               | WP_000998869.1           | 118             | 100            | no               |
| N315      | BAB41805.1               | 124             | 100            | BAB43387.1               | 115             | 100            | BAB41327.1               | 250             | 99.20          | D221N<br>D243N   | BAB43589.1               | 119             | 99,15          | D75E             |
| MW2       | WP_001018677.1           | 124             | 100            | WP_000036076.1           | 115             | 100            | WP_000876758.1           | 250             | 100            | no               | BAB58660.1               | 119             | 99,15          | D75E             |
| 55/2053   | WP_001018677.1           | 124             | 100            | WP_000036076.1           | 115             | 100            | WP_000876758.1           | 250             | 100            | no               | n/d                      | -               | -              | -                |
| MRSA252   | WP_001018677.1           | 124             | 100            | WP_000036076.1           | 115             | 100            | WP_000876758.1           | 250             | 100            | no               | n/d                      | -               | -              | -                |
| T0131     | WP_001018677.1           | 124             | 100            | WP_000036076.1           | 115             | 100            | AEB87224.1               | 250             | 100            | no               | WP_000998869.1           | 118             | 100            | no               |
| TW20      | WP_001018677.1           | 124             | 100            | WP_000036076.1           | 115             | 100            | WP_000876758.1           | 250             | 100            | no               | WP_000998869.1           | 118             | 100            | no               |
| JKD6008   | WP_001018677.1           | 124             | 100            | WP_000036076.1           | 115             | 100            | WP_000876758.1           | 250             | 100            | no               | WP_000998869.1           | 118             | 100            | no               |
| Z172      | WP_001018677.1           | 124             | 100            | WP_000036076.1           | 115             | 100            | WP_000876758.1           | 250             | 100            | no               | WP_000998869.1           | 118             | 100            | no               |
| Bmb9393   | WP_001018677.1           | 124             | 100            | WP_000036076.1           | 115             | 100            | WP_000876758.1           | 250             | 100            | no               | WP_000998869.1           | 118             | 100            | no               |
| V521      | n/d                      |                 |                | AND37114.1               | 115             | 100            | AND34701.1               | 250             | 100            | no               | n/d                      |                 |                |                  |
| Be62      | ALY22452.1               | 124             | 100            | ALY24202.1               | 115             | 100            | ALY21934.1               | 250             | 100            | no               | ALY24402.1               | 118             | 100            | no               |
| SA943     | RAM46821.1               | 124             | 100            | RAM46294.1               | 115             | 100            | RAM47915.1               | 250             | 100            | no               | RAM47202.1               | 118             | 100            | no               |

**Supplementary Table S9.** *Staphylococcus aureus* SarA locus proteins amino acid sequence: localization of amino acid substitutions and deletions (continued).

| Strain    | Sar X                                           | Aa <sup>1</sup> | Sar Z                                         | Aa <sup>1</sup> | Aa sub-stitu-<br>tions |       |   | SarV                                          | Aa <sup>1</sup> | SarU (sarH2)                                    | Repressor of toxin                                   |                 |                  | Query<br>Cover<br>(%) | Per<br>Ident<br>(%) |
|-----------|-------------------------------------------------|-----------------|-----------------------------------------------|-----------------|------------------------|-------|---|-----------------------------------------------|-----------------|-------------------------------------------------|------------------------------------------------------|-----------------|------------------|-----------------------|---------------------|
|           | (HTH-type<br>transcriptional<br>regulator SarX) |                 | (MarR family<br>transcriptional<br>regulator) |                 |                        |       |   | (MarR family<br>transcriptional<br>regulator) |                 | (HTH-type<br>transcriptional<br>regulator SarU) | Rot<br>(MarR family<br>transcriptional<br>regulator) | Aa <sup>1</sup> |                  |                       |                     |
| NCTC 8325 | n/d                                             | -               | WP_000289213.1                                | 148             | •                      | no    | • | WP_000066900.1                                | 116             | WP_000386367.1                                  | 247                                                  | WP_000757543.1  | 133              | 100                   | 100                 |
| Newman    | WP_001090985.1                                  | 119             | WP_000289213.1                                | 148             | •                      | no    | • | WP_000066900.1                                | 116             | n/d                                             | -                                                    | WP_000757543.1  | 133              | 100                   | 100                 |
| Col       | WP_001090985.1                                  | 119             | WP_000289213.1                                | 148             | •                      | no    |   | WP_000066900.1                                | 116             | n/d                                             | -                                                    | Q5HF12.1        | 166 <sup>5</sup> | 80                    | 90.25               |
| FPR3757   | WP_001090985.1                                  | 119             | WP_000289213.1                                | 148             | •                      | no    | • | WP_000066900.1                                | 116             | WP_000386366.1                                  | 247 <sup>2</sup>                                     | WP_000757543.1  | 133              | 100                   | 100                 |
| N315      | WP_001090985.1                                  | 119             | BAB43476.1                                    | 148*            | •                      | K147R | • | BAB43359.1                                    | 116             | WP_000386367.1                                  | 247                                                  | BAB42851.1      | 153 <sup>3</sup> | 86                    | 100                 |
|           |                                                 |                 | WP_000289215.1                                |                 |                        |       |   |                                               |                 |                                                 |                                                      | WP_000757543.1  | 133              | 100                   | 100                 |
| MW2       | WP_001090985.1                                  | 119             | WP_000289213.1                                | 148             |                        | no    |   | WP_000066900.1                                | 116             | WP_000386367.1                                  | 247                                                  | BAB95570.1      | 153 <sup>3</sup> | 86                    | 100                 |
|           |                                                 |                 |                                               |                 |                        |       |   |                                               |                 |                                                 |                                                      | WP_000757543.1  | 133              | 100                   | 100                 |
| 55/2053   | n/d                                             | -               | n/d                                           | -               | -                      |       |   | WP_000066900.1                                | 116             | n/d                                             | -                                                    | EEV03715.1      | 166 <sup>4</sup> | 80                    | 100                 |
| MRSA252   | n/d                                             | -               | n/d                                           | -               | -                      |       |   | WP_000066900.1                                | 116             | n/d                                             | -                                                    | Q6GFT9.1        | 166 <sup>4</sup> | 80                    | 100                 |
|           |                                                 |                 |                                               |                 |                        |       |   |                                               |                 |                                                 |                                                      | WP_000757543.1  | 133              | 100                   | 100                 |
| T0131     | WP_001090985.1                                  | 119             | AEB89486.1                                    | 148             | no                     |       |   | WP_000066900.1                                | 116             | WP_000386367.1                                  | 247                                                  | AEB88851.1      | 133              | 100                   | 100                 |
| TW20      | WP_001090985.1                                  | 119             | WP_000289213.1                                | 148             | no                     |       |   | WP_000066900.1                                | 116             | WP_000386367.1                                  | 247                                                  | WP_000757543.1  | 133              | 100                   | 100                 |
| JKD6008   | WP_001090985.1                                  | 119             | WP_000289213.1                                | 148             | no                     |       |   | WP_000066900.1                                | 116             | WP_000386367.1                                  | 247                                                  | WP_000757543.1  | 133              | 100                   | 100                 |
| Z172      | WP_001090985.1                                  | 119             | WP_000289213.1                                | 148             | no                     |       |   | WP_000066900.1                                | 116             | WP_000386367.1                                  | 247                                                  | WP_000757543.1  | 133              | 100                   | 100                 |
| Bmb9393   | WP_001090985.1                                  | 119             | WP_000289213.1                                | 148             | no                     |       |   | WP_000066900.1                                | 116             | WP_000386367.1                                  | 247                                                  | WP_000757543.1  | 133              | 100                   | 100                 |
| V521      | AND37581.1                                      | 119             | n/d                                           | -               | -                      |       |   | AND37084.1                                    | 116             | AND37117.1                                      | 247                                                  | n/d             | -                | -                     | -                   |
| Be62      | ALY22503.1                                      | 119             | ALY24649.1                                    | 148             | no                     |       |   | ALY24173.1                                    | 116             | ALY24403.1                                      | 247                                                  | n/d             | -                | -                     | -                   |
| SA943     | RAM47004.1                                      | 119             | ?                                             | -               | -                      |       |   | RAM46266.1                                    | 116             | RAM46810.1                                      | 247                                                  | RAM45395.1      | 133              | 100                   | 100                 |

Note: 1- Aa<sup>1</sup>- number of amino acids; <sup>2</sup>- identities - 99,6; aa substitution **L211H**; <sup>3</sup> – BAB42851.1 and BAB95570.1 are identical and have 20 amino acids additionally at the N-terminus, the remaining 133 amino acids are common with WP\_000757543.1; <sup>4</sup> Q6GFT9.1 and EEV03715.1 are identical and have 30 amino acids additionally at the N-terminus, the remaining 133 amino acids are common with WP\_000757543.1; Q5HF12.1 is more different, has 30 amino acids additionally at the N-terminus and amino acid substitution **S51F**. The localization of this substitution is indicated when aligned with the protein WP\_000757543.1 in reference genome NCTC 8325
